# Supplementary material for: Effect of intraarticular inoculation of mesenchymal stem cells in dogs with hip osteoarthritis by means of objective force platform gait analysis: concordance with numeric subjective scoring scales
Source: PubMed Central journal article supplement (PMC5055672; doi:10.1186/s12917-016-0852-z), 2016-10-07
Supplement: 12917_2016_852_MOESM2_ESM.pdf [file 12917_2016_852_MOESM2_ESM.pdf]

## Hojal

| dog   | day | leg | diseased | weight | force  | impulse |
|-------|-----|-----|----------|--------|--------|---------|
| DOG-1 | 0   | LL  | TRUE     | 465,8  | 158,56 | 47,567  |
| DOG-1 | 0   | LL  | TRUE     | 465,8  | 157,3  | 47,191  |
| DOG-1 | 0   | LL  | TRUE     | 465,8  | 207,93 | 60,2984 |
| DOG-1 | 0   | LL  | TRUE     | 465,8  | 180,96 | 56,0968 |
| DOG-1 | 0   | LL  | TRUE     | 465,8  | 158,95 | 52,4534 |
| DOG-1 | 30  | LL  | TRUE     | 465,8  | 176,2  | 52,8609 |
| DOG-1 | 30  | LL  | TRUE     | 465,8  | 174,24 | 52,2723 |
| DOG-1 | 30  | LL  | TRUE     | 465,8  | 171,85 | 49,8367 |
| DOG-1 | 30  | LL  | TRUE     | 465,8  | 171,03 | 53,0206 |
| DOG-1 | 30  | LL  | TRUE     | 465,8  | 188,27 | 62,1283 |
| DOG-1 | 90  | LL  | TRUE     | 465,8  | 206,52 | 61,9559 |
| DOG-1 | 90  | LL  | TRUE     | 465,8  | 181,07 | 56,1324 |
| DOG-1 | 90  | LL  | TRUE     | 465,8  | 179,65 | 52,0994 |
| DOG-1 | 90  | LL  | TRUE     | 465,8  | 182,24 | 60,1407 |
| DOG-1 | 90  | LL  | TRUE     | 465,8  | 176,04 | 52,8106 |
| DOG-1 | 180 | LL  | TRUE     | 465,8  | 174,43 | 54,0734 |
| DOG-1 | 180 | LL  | TRUE     | 465,8  | 182,6  | 54,7798 |
| DOG-1 | 180 | LL  | TRUE     | 465,8  | 176,56 | 58,2644 |
| DOG-1 | 180 | LL  | TRUE     | 465,8  | 177,32 | 53,1945 |
| DOG-1 | 180 | LL  | TRUE     | 465,8  | 157,75 | 45,7481 |
| DOG-1 | 0   | ML  | TRUE     | 465,8  | 197,27 | 65,1    |
| DOG-1 | 0   | ML  | TRUE     | 465,8  | 205,01 | 61,5024 |
| DOG-1 | 0   | ML  | TRUE     | 465,8  | 179,62 | 53,8874 |
| DOG-1 | 0   | ML  | TRUE     | 465,8  | 209,66 | 64,9951 |
| DOG-1 | 0   | ML  | TRUE     | 465,8  | 177    | 51,3291 |
| DOG-1 | 30  | ML  | TRUE     | 465,8  | 238,3  | 73,8731 |
| DOG-1 | 30  | ML  | TRUE     | 465,8  | 232,37 | 76,6828 |
| DOG-1 | 30  | ML  | TRUE     | 465,8  | 227,14 | 68,1432 |
| DOG-1 | 30  | ML  | TRUE     | 465,8  | 245,14 | 73,5423 |
| DOG-1 | 30  | ML  | TRUE     | 465,8  | 234,02 | 67,8661 |
| DOG-1 | 90  | ML  | TRUE     | 465,8  | 229,94 | 68,9828 |
| DOG-1 | 90  | ML  | TRUE     | 465,8  | 237,18 | 73,5258 |
| DOG-1 | 90  | ML  | TRUE     | 465,8  | 267,36 | 80,2066 |
| DOG-1 | 90  | ML  | TRUE     | 465,8  | 226,6  | 65,715  |
| DOG-1 | 90  | ML  | TRUE     | 465,8  | 232,51 | 67,4279 |
| DOG-1 | 180 | ML  | TRUE     | 465,8  | 210,23 | 60,9679 |
| DOG-1 | 180 | ML  | TRUE     | 465,8  | 219,59 | 65,8768 |
| DOG-1 | 180 | ML  | TRUE     | 465,8  | 227,08 | 68,1231 |
| DOG-1 | 180 | ML  | TRUE     | 465,8  | 220,44 | 72,7445 |
| DOG-1 | 180 | ML  | TRUE     | 465,8  | 219,84 | 68,1494 |
| DOG-2 | 0   | LL  | TRUE     | 419,1  | 207,88 | 60,2841 |
| DOG-2 | 0   | LL  | TRUE     | 419,1  | 210,9  | 65,3776 |
| DOG-2 | 0   | LL  | TRUE     | 419,1  | 220,81 | 66,2418 |
| DOG-2 | 0   | LL  | TRUE     | 419,1  | 223,57 | 67,0708 |
| DOG-2 | 0   | LL  | TRUE     | 419,1  | 221,65 | 73,1433 |
| DOG-2 | 30  | LL  | TRUE     | 419,1  | 215,46 | 66,7916 |
| DOG-2 | 30  | LL  | TRUE     | 419,1  | 223,67 | 67,0997 |
| DOG-2 | 30  | LL  | TRUE     | 419,1  | 224,72 | 74,1582 |
| DOG-2 | 30  | LL  | TRUE     | 419,1  | 227,09 | 68,1273 |
| DOG-2 | 30  | LL  | TRUE     | 419,1  | 222,6  | 64,554  |
| DOG-2 | 90  | LL  | TRUE     | 419,1  | 215,75 | 66,8839 |
| DOG-2 | 90  | LL  | TRUE     | 419,1  | 216,22 | 71,3535 |
| DOG-2 | 90  | LL  | TRUE     | 419,1  | 218,5  | 63,3636 |
| DOG-2 | 90  | LL  | TRUE     | 419,1  | 221,92 | 66,5761 |

Hojal

|       |        |      |       |        |         |
|-------|--------|------|-------|--------|---------|
| DOG-2 | 90 LL  | TRUE | 419,1 | 227,47 | 68,2402 |
| DOG-2 | 180 LL | TRUE | 419,1 | 210,4  | 63,1191 |
| DOG-2 | 180 LL | TRUE | 419,1 | 225,11 | 74,2864 |
| DOG-2 | 180 LL | TRUE | 419,1 | 203,5  | 61,0486 |
| DOG-2 | 180 LL | TRUE | 419,1 | 220,25 | 63,8731 |
| DOG-2 | 180 LL | TRUE | 419,1 | 222,23 | 68,8908 |
| DOG-2 | 0 ML   | TRUE | 419,1 | 178,67 | 51,8135 |
| DOG-2 | 0 ML   | TRUE | 419,1 | 148,8  | 49,1031 |
| DOG-2 | 0 ML   | TRUE | 419,1 | 155,48 | 46,6441 |
| DOG-2 | 0 ML   | TRUE | 419,1 | 150,7  | 46,7161 |
| DOG-2 | 0 ML   | TRUE | 419,1 | 149,49 | 46,3419 |
| DOG-2 | 30 ML  | TRUE | 419,1 | 218,02 | 65,4075 |
| DOG-2 | 30 ML  | TRUE | 419,1 | 194,03 | 60,1503 |
| DOG-2 | 30 ML  | TRUE | 419,1 | 186,54 | 54,0967 |
| DOG-2 | 30 ML  | TRUE | 419,1 | 209,34 | 69,0808 |
| DOG-2 | 30 ML  | TRUE | 419,1 | 200,79 | 60,2382 |
| DOG-2 | 90 ML  | TRUE | 419,1 | 156,25 | 46,8765 |
| DOG-2 | 90 ML  | TRUE | 419,1 | 168,93 | 52,368  |
| DOG-2 | 90 ML  | TRUE | 419,1 | 176,8  | 51,2732 |
| DOG-2 | 90 ML  | TRUE | 419,1 | 179,15 | 59,1189 |
| DOG-2 | 90 ML  | TRUE | 419,1 | 162,69 | 48,8064 |
| DOG-2 | 180 ML | TRUE | 419,1 | 148,27 | 44,4802 |
| DOG-2 | 180 ML | TRUE | 419,1 | 168,13 | 52,1201 |
| DOG-2 | 180 ML | TRUE | 419,1 | 156,17 | 46,8524 |
| DOG-2 | 180 ML | TRUE | 419,1 | 153,15 | 44,4125 |
| DOG-2 | 180 ML | TRUE | 419,1 | 159,07 | 52,4937 |
| DOG-3 | 0 LL   | TRUE | 452   | 230,32 | 69,096  |
| DOG-3 | 0 LL   | TRUE | 452   | 236,23 | 70,869  |
| DOG-3 | 0 LL   | TRUE | 452   | 251,43 | 77,9433 |
| DOG-3 | 0 LL   | TRUE | 452   | 226,68 | 68,004  |
| DOG-3 | 0 LL   | TRUE | 452   | 241,33 | 74,8123 |
| DOG-3 | 30 LL  | TRUE | 452   | 257,23 | 77,169  |
| DOG-3 | 30 LL  | TRUE | 452   | 239,52 | 74,2512 |
| DOG-3 | 30 LL  | TRUE | 452   | 245,27 | 73,581  |
| DOG-3 | 30 LL  | TRUE | 452   | 229,76 | 66,6304 |
| DOG-3 | 30 LL  | TRUE | 452   | 231,57 | 67,1553 |
| DOG-3 | 90 LL  | TRUE | 452   | 238,86 | 71,658  |
| DOG-3 | 90 LL  | TRUE | 452   | 263,23 | 81,6013 |
| DOG-3 | 90 LL  | TRUE | 452   | 247,12 | 74,136  |
| DOG-3 | 90 LL  | TRUE | 452   | 226,34 | 65,6386 |
| DOG-3 | 90 LL  | TRUE | 452   | 237,35 | 75,952  |
| DOG-3 | 180 LL | TRUE | 452   | 219,54 | 65,862  |
| DOG-3 | 180 LL | TRUE | 452   | 256,21 | 74,3009 |
| DOG-3 | 180 LL | TRUE | 452   | 253,54 | 76,062  |
| DOG-3 | 180 LL | TRUE | 452   | 237,13 | 73,5103 |
| DOG-3 | 180 LL | TRUE | 452   | 225,75 | 67,725  |
| DOG-3 | 0 ML   | TRUE | 452   | 166,31 | 49,893  |
| DOG-3 | 0 ML   | TRUE | 452   | 177,82 | 55,1242 |
| DOG-3 | 0 ML   | TRUE | 452   | 174,01 | 52,203  |
| DOG-3 | 0 ML   | TRUE | 452   | 167,69 | 53,6608 |
| DOG-3 | 0 ML   | TRUE | 452   | 173,05 | 50,1845 |
| DOG-3 | 30 ML  | TRUE | 452   | 232,29 | 67,3641 |
| DOG-3 | 30 ML  | TRUE | 452   | 223,05 | 66,915  |
| DOG-3 | 30 ML  | TRUE | 452   | 216,19 | 67,0189 |
| DOG-3 | 30 ML  | TRUE | 452   | 213,13 | 63,939  |

Hojal

|       |           |       |       |        |         |
|-------|-----------|-------|-------|--------|---------|
| DOG-3 | 30 ML     | TRUE  | 452   | 208,63 | 64,6753 |
| DOG-3 | 90 ML     | TRUE  | 452   | 191,48 | 57,444  |
| DOG-3 | 90 ML     | TRUE  | 452   | 179,57 | 55,6667 |
| DOG-3 | 90 ML     | TRUE  | 452   | 212,28 | 63,684  |
| DOG-3 | 90 ML     | TRUE  | 452   | 189,58 | 54,9782 |
| DOG-3 | 90 ML     | TRUE  | 452   | 193,51 | 59,9881 |
| DOG-3 | 180 ML    | TRUE  | 452   | 175,42 | 54,3802 |
| DOG-3 | 180 ML    | TRUE  | 452   | 175,9  | 52,77   |
| DOG-3 | 180 ML    | TRUE  | 452   | 184,07 | 55,221  |
| DOG-3 | 180 ML    | TRUE  | 452   | 183,88 | 53,3252 |
| DOG-3 | 180 ML    | TRUE  | 452   | 184,91 | 57,3221 |
| DOG-4 | 0 SOUND   | FALSE | 475,3 | 193,1  | 57,93   |
| DOG-4 | 0 SOUND   | FALSE | 475,3 | 190,52 | 57,156  |
| DOG-4 | 0 SOUND   | FALSE | 475,3 | 195,17 | 60,5027 |
| DOG-4 | 0 SOUND   | FALSE | 475,3 | 194,09 | 56,2861 |
| DOG-4 | 0 SOUND   | FALSE | 475,3 | 190,22 | 57,066  |
| DOG-4 | 30 SOUND  | FALSE | 475,3 | 196,13 | 60,8003 |
| DOG-4 | 30 SOUND  | FALSE | 475,3 | 195,56 | 58,668  |
| DOG-4 | 30 SOUND  | FALSE | 475,3 | 192,19 | 55,7351 |
| DOG-4 | 30 SOUND  | FALSE | 475,3 | 193,42 | 58,026  |
| DOG-4 | 30 SOUND  | FALSE | 475,3 | 195,19 | 62,4608 |
| DOG-4 | 90 SOUND  | FALSE | 475,3 | 195,56 | 60,6236 |
| DOG-4 | 90 SOUND  | FALSE | 475,3 | 191,43 | 57,429  |
| DOG-4 | 90 SOUND  | FALSE | 475,3 | 191,03 | 55,3987 |
| DOG-4 | 90 SOUND  | FALSE | 475,3 | 186,33 | 55,899  |
| DOG-4 | 90 SOUND  | FALSE | 475,3 | 199,5  | 61,845  |
| DOG-4 | 180 SOUND | FALSE | 475,3 | 187,93 | 56,379  |
| DOG-4 | 180 SOUND | FALSE | 475,3 | 193,76 | 60,0656 |
| DOG-4 | 180 SOUND | FALSE | 475,3 | 191,23 | 57,369  |
| DOG-4 | 180 SOUND | FALSE | 475,3 | 189,45 | 54,9405 |
| DOG-4 | 180 SOUND | FALSE | 475,3 | 192,06 | 63,3798 |
| DOG-5 | 0 LL      | TRUE  | 509,6 | 184,54 | 57,2074 |
| DOG-5 | 0 LL      | TRUE  | 509,6 | 199,95 | 65,9835 |
| DOG-5 | 0 LL      | TRUE  | 509,6 | 189,19 | 54,8651 |
| DOG-5 | 0 LL      | TRUE  | 509,6 | 182,68 | 58,4576 |
| DOG-5 | 0 LL      | TRUE  | 509,6 | 178,77 | 53,631  |
| DOG-5 | 30 LL     | TRUE  | 509,6 | 183,2  | 56,792  |
| DOG-5 | 30 LL     | TRUE  | 509,6 | 191,95 | 55,6655 |
| DOG-5 | 30 LL     | TRUE  | 509,6 | 169,95 | 50,985  |
| DOG-5 | 30 LL     | TRUE  | 509,6 | 188,27 | 62,1291 |
| DOG-5 | 30 LL     | TRUE  | 509,6 | 181,54 | 58,0928 |
| DOG-5 | 90 LL     | TRUE  | 509,6 | 241,96 | 72,588  |
| DOG-5 | 90 LL     | TRUE  | 509,6 | 242,71 | 75,2401 |
| DOG-5 | 90 LL     | TRUE  | 509,6 | 243,11 | 75,3641 |
| DOG-5 | 90 LL     | TRUE  | 509,6 | 241,59 | 70,0611 |
| DOG-5 | 90 LL     | TRUE  | 509,6 | 243    | 75,33   |
| DOG-5 | 180 LL    | TRUE  | 509,6 | 189,65 | 56,895  |
| DOG-5 | 180 LL    | TRUE  | 509,6 | 183,85 | 56,9935 |
| DOG-5 | 180 LL    | TRUE  | 509,6 | 188,62 | 58,4722 |
| DOG-5 | 180 LL    | TRUE  | 509,6 | 185,34 | 53,7486 |
| DOG-5 | 180 LL    | TRUE  | 509,6 | 186,7  | 54,143  |
| DOG-5 | 0 ML      | TRUE  | 509,6 | 166,54 | 48,2966 |
| DOG-5 | 0 ML      | TRUE  | 509,6 | 179,2  | 53,76   |
| DOG-5 | 0 ML      | TRUE  | 509,6 | 162,18 | 53,5194 |
| DOG-5 | 0 ML      | TRUE  | 509,6 | 171,36 | 53,1216 |

Hojal

|       |        |      |       |        |         |
|-------|--------|------|-------|--------|---------|
| DOG-5 | 0 ML   | TRUE | 509,6 | 175,46 | 56,1472 |
| DOG-5 | 30 ML  | TRUE | 509,6 | 176,32 | 51,1328 |
| DOG-5 | 30 ML  | TRUE | 509,6 | 180    | 59,4    |
| DOG-5 | 30 ML  | TRUE | 509,6 | 179,83 | 53,949  |
| DOG-5 | 30 ML  | TRUE | 509,6 | 178,37 | 51,7273 |
| DOG-5 | 30 ML  | TRUE | 509,6 | 185,21 | 57,4151 |
| DOG-5 | 90 ML  | TRUE | 509,6 | 213,18 | 61,8222 |
| DOG-5 | 90 ML  | TRUE | 509,6 | 214,33 | 70,7289 |
| DOG-5 | 90 ML  | TRUE | 509,6 | 216,39 | 64,917  |
| DOG-5 | 90 ML  | TRUE | 509,6 | 212,6  | 61,654  |
| DOG-5 | 90 ML  | TRUE | 509,6 | 215,65 | 64,695  |
| DOG-5 | 180 ML | TRUE | 509,6 | 169,83 | 52,6473 |
| DOG-5 | 180 ML | TRUE | 509,6 | 178,37 | 58,8621 |
| DOG-5 | 180 ML | TRUE | 509,6 | 175,63 | 50,9327 |
| DOG-5 | 180 ML | TRUE | 509,6 | 175,21 | 52,563  |
| DOG-5 | 180 ML | TRUE | 509,6 | 174,58 | 52,374  |
| DOG-6 | 0 LL   | TRUE | 497,5 | 242,38 | 70,2894 |
| DOG-6 | 0 LL   | TRUE | 497,5 | 256,23 | 84,5548 |
| DOG-6 | 0 LL   | TRUE | 497,5 | 261,26 | 78,3786 |
| DOG-6 | 0 LL   | TRUE | 497,5 | 256,44 | 76,9324 |
| DOG-6 | 0 LL   | TRUE | 497,5 | 250,73 | 77,7274 |
| DOG-6 | 30 LL  | TRUE | 497,5 | 251,15 | 82,8798 |
| DOG-6 | 30 LL  | TRUE | 497,5 | 252,87 | 75,8624 |
| DOG-6 | 30 LL  | TRUE | 497,5 | 260,47 | 80,746  |
| DOG-6 | 30 LL  | TRUE | 497,5 | 263,52 | 76,4216 |
| DOG-6 | 30 LL  | TRUE | 497,5 | 244,4  | 73,32   |
| DOG-6 | 90 LL  | TRUE | 497,5 | 253,79 | 76,1381 |
| DOG-6 | 90 LL  | TRUE | 497,5 | 253,13 | 73,4068 |
| DOG-6 | 90 LL  | TRUE | 497,5 | 254,12 | 83,8593 |
| DOG-6 | 90 LL  | TRUE | 497,5 | 252,93 | 73,3497 |
| DOG-6 | 90 LL  | TRUE | 497,5 | 253,39 | 78,5509 |
| DOG-6 | 180 LL | TRUE | 497,5 | 251,28 | 82,9238 |
| DOG-6 | 180 LL | TRUE | 497,5 | 248,35 | 74,5065 |
| DOG-6 | 180 LL | TRUE | 497,5 | 245,57 | 73,671  |
| DOG-6 | 180 LL | TRUE | 497,5 | 231,18 | 67,0412 |
| DOG-6 | 180 LL | TRUE | 497,5 | 245,47 | 76,0971 |
| DOG-6 | 0 ML   | TRUE | 497,5 | 192,1  | 57,6311 |
| DOG-6 | 0 ML   | TRUE | 497,5 | 195,12 | 60,4871 |
| DOG-6 | 0 ML   | TRUE | 497,5 | 192,2  | 55,7391 |
| DOG-6 | 0 ML   | TRUE | 497,5 | 196,15 | 64,7308 |
| DOG-6 | 0 ML   | TRUE | 497,5 | 194,33 | 58,3    |
| DOG-6 | 30 ML  | TRUE | 497,5 | 233,32 | 67,6619 |
| DOG-6 | 30 ML  | TRUE | 497,5 | 233,37 | 70,0109 |
| DOG-6 | 30 ML  | TRUE | 497,5 | 231,94 | 71,9005 |
| DOG-6 | 30 ML  | TRUE | 497,5 | 234,45 | 70,3347 |
| DOG-6 | 30 ML  | TRUE | 497,5 | 232,33 | 67,3757 |
| DOG-6 | 90 ML  | TRUE | 497,5 | 182,11 | 54,6319 |
| DOG-6 | 90 ML  | TRUE | 497,5 | 179,06 | 51,9271 |
| DOG-6 | 90 ML  | TRUE | 497,5 | 180,32 | 59,5047 |
| DOG-6 | 90 ML  | TRUE | 497,5 | 178,87 | 51,8723 |
| DOG-6 | 90 ML  | TRUE | 497,5 | 181,02 | 54,306  |
| DOG-6 | 180 ML | TRUE | 497,5 | 173,66 | 53,8353 |
| DOG-6 | 180 ML | TRUE | 497,5 | 175,77 | 50,9733 |
| DOG-6 | 180 ML | TRUE | 497,5 | 174,75 | 52,4263 |
| DOG-6 | 180 ML | TRUE | 497,5 | 177,39 | 53,2165 |

Hojal

|       |          |       |       |        |         |
|-------|----------|-------|-------|--------|---------|
| DOG-6 | 180 ML   | TRUE  | 497,5 | 172,58 | 56,9524 |
| DOG-7 | 0 LL     | TRUE  | 529,2 | 257,28 | 74,6112 |
| DOG-7 | 0 LL     | TRUE  | 529,2 | 283,56 | 87,9036 |
| DOG-7 | 0 LL     | TRUE  | 529,2 | 267,55 | 80,265  |
| DOG-7 | 0 LL     | TRUE  | 529,2 | 280,87 | 81,4523 |
| DOG-7 | 0 LL     | TRUE  | 529,2 | 260,23 | 75,4667 |
| DOG-7 | 30 LL    | TRUE  | 529,2 | 258,91 | 75,0839 |
| DOG-7 | 30 LL    | TRUE  | 529,2 | 274,27 | 82,281  |
| DOG-7 | 30 LL    | TRUE  | 529,2 | 284,47 | 88,1857 |
| DOG-7 | 30 LL    | TRUE  | 529,2 | 281,96 | 84,588  |
| DOG-7 | 30 LL    | TRUE  | 529,2 | 261,78 | 75,9162 |
| DOG-7 | 90 LL    | TRUE  | 529,2 | 311,01 | 96,4131 |
| DOG-7 | 90 LL    | TRUE  | 529,2 | 275,95 | 88,304  |
| DOG-7 | 90 LL    | TRUE  | 529,2 | 250,2  | 75,06   |
| DOG-7 | 90 LL    | TRUE  | 529,2 | 228,28 | 73,0496 |
| DOG-7 | 90 LL    | TRUE  | 529,2 | 248,31 | 72,0099 |
| DOG-7 | 180 LL   | TRUE  | 529,2 | 282,58 | 90,4256 |
| DOG-7 | 180 LL   | TRUE  | 529,2 | 255,69 | 76,707  |
| DOG-7 | 180 LL   | TRUE  | 529,2 | 253,62 | 73,5498 |
| DOG-7 | 180 LL   | TRUE  | 529,2 | 229,39 | 73,4048 |
| DOG-7 | 180 LL   | TRUE  | 529,2 | 261,04 | 78,312  |
| DOG-7 | 0 ML     | TRUE  | 529,2 | 245,31 | 73,593  |
| DOG-7 | 0 ML     | TRUE  | 529,2 | 209,1  | 69,003  |
| DOG-7 | 0 ML     | TRUE  | 529,2 | 223,87 | 64,9223 |
| DOG-7 | 0 ML     | TRUE  | 529,2 | 192,6  | 59,706  |
| DOG-7 | 0 ML     | TRUE  | 529,2 | 210,94 | 67,5008 |
| DOG-7 | 30 ML    | TRUE  | 529,2 | 239,3  | 74,183  |
| DOG-7 | 30 ML    | TRUE  | 529,2 | 233,92 | 70,176  |
| DOG-7 | 30 ML    | TRUE  | 529,2 | 232,78 | 67,5062 |
| DOG-7 | 30 ML    | TRUE  | 529,2 | 235,69 | 70,707  |
| DOG-7 | 30 ML    | TRUE  | 529,2 | 232,49 | 72,0719 |
| DOG-7 | 90 ML    | TRUE  | 529,2 | 260,74 | 78,222  |
| DOG-7 | 90 ML    | TRUE  | 529,2 | 211,27 | 69,7191 |
| DOG-7 | 90 ML    | TRUE  | 529,2 | 227,47 | 70,5157 |
| DOG-7 | 90 ML    | TRUE  | 529,2 | 210,4  | 61,016  |
| DOG-7 | 90 ML    | TRUE  | 529,2 | 213,58 | 64,074  |
| DOG-7 | 180 ML   | TRUE  | 529,2 | 235,31 | 68,2399 |
| DOG-7 | 180 ML   | TRUE  | 529,2 | 211,73 | 69,8709 |
| DOG-7 | 180 ML   | TRUE  | 529,2 | 219,12 | 70,1184 |
| DOG-7 | 180 ML   | TRUE  | 529,2 | 228,82 | 70,9342 |
| DOG-7 | 180 ML   | TRUE  | 529,2 | 196,7  | 59,01   |
| DOG-8 | 0 SOUND  | FALSE | 509,6 | 256    | 81,92   |
| DOG-8 | 0 SOUND  | FALSE | 509,6 | 252    | 78,12   |
| DOG-8 | 0 SOUND  | FALSE | 509,6 | 222    | 66,6    |
| DOG-8 | 0 SOUND  | FALSE | 509,6 | 220    | 63,8    |
| DOG-8 | 0 SOUND  | FALSE | 509,6 | 233    | 76,89   |
| DOG-8 | 30 SOUND | FALSE | 509,6 | 227,77 | 66,0533 |
| DOG-8 | 30 SOUND | FALSE | 509,6 | 240,67 | 79,4211 |
| DOG-8 | 30 SOUND | FALSE | 509,6 | 238,54 | 71,562  |
| DOG-8 | 30 SOUND | FALSE | 509,6 | 238,22 | 73,8482 |
| DOG-8 | 30 SOUND | FALSE | 509,6 | 236,56 | 70,968  |
| DOG-8 | 90 SOUND | FALSE | 509,6 | 233,13 | 69,939  |
| DOG-8 | 90 SOUND | FALSE | 509,6 | 230,34 | 71,4054 |
| DOG-8 | 90 SOUND | FALSE | 509,6 | 239,58 | 71,874  |
| DOG-8 | 90 SOUND | FALSE | 509,6 | 249,12 | 72,2448 |

## Hojal

|        |     |       |       |       |        |          |
|--------|-----|-------|-------|-------|--------|----------|
| DOG-8  | 90  | SOUND | FALSE | 509,6 | 242,23 | 79,9359  |
| DOG-8  | 180 | SOUND | FALSE | 509,6 | 234,63 | 70,389   |
| DOG-8  | 180 | SOUND | FALSE | 509,6 | 231,48 | 71,7588  |
| DOG-8  | 180 | SOUND | FALSE | 509,6 | 243,67 | 73,101   |
| DOG-8  | 180 | SOUND | FALSE | 509,6 | 233,87 | 67,8223  |
| DOG-8  | 180 | SOUND | FALSE | 509,6 | 229,54 | 75,7482  |
| DOG-9  | 0   | LL    | TRUE  | 628   | 337,18 | 101,154  |
| DOG-9  | 0   | LL    | TRUE  | 628   | 325,43 | 100,8833 |
| DOG-9  | 0   | LL    | TRUE  | 628   | 312,76 | 93,828   |
| DOG-9  | 0   | LL    | TRUE  | 628   | 318,26 | 92,2954  |
| DOG-9  | 0   | LL    | TRUE  | 628   | 323,91 | 93,9339  |
| DOG-9  | 30  | LL    | TRUE  | 628   | 348,27 | 104,481  |
| DOG-9  | 30  | LL    | TRUE  | 628   | 324,23 | 100,5113 |
| DOG-9  | 30  | LL    | TRUE  | 628   | 333,67 | 100,101  |
| DOG-9  | 30  | LL    | TRUE  | 628   | 338,81 | 105,0311 |
| DOG-9  | 30  | LL    | TRUE  | 628   | 337,85 | 97,9765  |
| DOG-9  | 90  | LL    | TRUE  | 628   | 323,28 | 93,7512  |
| DOG-9  | 90  | LL    | TRUE  | 628   | 342,12 | 102,636  |
| DOG-9  | 90  | LL    | TRUE  | 628   | 324,86 | 100,7066 |
| DOG-9  | 90  | LL    | TRUE  | 628   | 338,21 | 101,463  |
| DOG-9  | 90  | LL    | TRUE  | 628   | 332,77 | 96,5033  |
| DOG-9  | 180 | LL    | TRUE  | 628   | 340,52 | 105,5612 |
| DOG-9  | 180 | LL    | TRUE  | 628   | 328,88 | 101,9528 |
| DOG-9  | 180 | LL    | TRUE  | 628   | 309,58 | 95,9698  |
| DOG-9  | 180 | LL    | TRUE  | 628   | 320,66 | 96,198   |
| DOG-9  | 180 | LL    | TRUE  | 628   | 302,62 | 90,786   |
| DOG-9  | 0   | ML    | TRUE  | 628   | 241,28 | 72,384   |
| DOG-9  | 0   | ML    | TRUE  | 628   | 244,37 | 75,7547  |
| DOG-9  | 0   | ML    | TRUE  | 628   | 246,77 | 74,031   |
| DOG-9  | 0   | ML    | TRUE  | 628   | 239,09 | 69,3361  |
| DOG-9  | 0   | ML    | TRUE  | 628   | 235,25 | 77,6325  |
| DOG-9  | 30  | ML    | TRUE  | 628   | 321,24 | 96,372   |
| DOG-9  | 30  | ML    | TRUE  | 628   | 297,74 | 92,2994  |
| DOG-9  | 30  | ML    | TRUE  | 628   | 317,08 | 95,124   |
| DOG-9  | 30  | ML    | TRUE  | 628   | 329,03 | 95,4187  |
| DOG-9  | 30  | ML    | TRUE  | 628   | 322,34 | 99,9254  |
| DOG-9  | 90  | ML    | TRUE  | 628   | 254,32 | 76,296   |
| DOG-9  | 90  | ML    | TRUE  | 628   | 274,62 | 79,6398  |
| DOG-9  | 90  | ML    | TRUE  | 628   | 279,76 | 83,928   |
| DOG-9  | 90  | ML    | TRUE  | 628   | 265,26 | 82,2306  |
| DOG-9  | 90  | ML    | TRUE  | 628   | 256,22 | 81,9904  |
| DOG-9  | 180 | ML    | TRUE  | 628   | 245,23 | 73,569   |
| DOG-9  | 180 | ML    | TRUE  | 628   | 250,5  | 77,655   |
| DOG-9  | 180 | ML    | TRUE  | 628   | 247,37 | 74,211   |
| DOG-9  | 180 | ML    | TRUE  | 628   | 243,54 | 70,6266  |
| DOG-9  | 180 | ML    | TRUE  | 628   | 246,88 | 76,5328  |
| DOG-10 | 0   | LL    | TRUE  | 505,3 | 245,33 | 80,9594  |
| DOG-10 | 0   | LL    | TRUE  | 505,3 | 248,12 | 74,4349  |
| DOG-10 | 0   | LL    | TRUE  | 505,3 | 249,66 | 72,4011  |
| DOG-10 | 0   | LL    | TRUE  | 505,3 | 235,03 | 72,8581  |
| DOG-10 | 0   | LL    | TRUE  | 505,3 | 244,43 | 73,3286  |
| DOG-10 | 30  | LL    | TRUE  | 505,3 | 267,31 | 80,1932  |
| DOG-10 | 30  | LL    | TRUE  | 505,3 | 268,61 | 83,2706  |
| DOG-10 | 30  | LL    | TRUE  | 505,3 | 259,78 | 77,9352  |
| DOG-10 | 30  | LL    | TRUE  | 505,3 | 275,21 | 90,8182  |

## Hojal

|        |           |       |       |        |         |
|--------|-----------|-------|-------|--------|---------|
| DOG-10 | 30 LL     | TRUE  | 505,3 | 280,25 | 81,2714 |
| DOG-10 | 90 LL     | TRUE  | 505,3 | 275,66 | 90,9686 |
| DOG-10 | 90 LL     | TRUE  | 505,3 | 254,67 | 78,9488 |
| DOG-10 | 90 LL     | TRUE  | 505,3 | 272,25 | 78,9538 |
| DOG-10 | 90 LL     | TRUE  | 505,3 | 264,42 | 79,3268 |
| DOG-10 | 90 LL     | TRUE  | 505,3 | 251,52 | 75,4573 |
| DOG-10 | 180 LL    | TRUE  | 505,3 | 244,04 | 80,5332 |
| DOG-10 | 180 LL    | TRUE  | 505,3 | 260,44 | 78,1333 |
| DOG-10 | 180 LL    | TRUE  | 505,3 | 245,75 | 71,2675 |
| DOG-10 | 180 LL    | TRUE  | 505,3 | 251,99 | 75,5977 |
| DOG-10 | 180 LL    | TRUE  | 505,3 | 252,17 | 78,1713 |
| DOG-10 | 0 ML      | TRUE  | 505,3 | 222,87 | 73,5486 |
| DOG-10 | 0 ML      | TRUE  | 505,3 | 222,78 | 66,8355 |
| DOG-10 | 0 ML      | TRUE  | 505,3 | 222,54 | 66,7611 |
| DOG-10 | 0 ML      | TRUE  | 505,3 | 222,62 | 69,0131 |
| DOG-10 | 0 ML      | TRUE  | 505,3 | 222,77 | 64,6038 |
| DOG-10 | 30 ML     | TRUE  | 505,3 | 228,29 | 70,7692 |
| DOG-10 | 30 ML     | TRUE  | 505,3 | 228,5  | 66,2643 |
| DOG-10 | 30 ML     | TRUE  | 505,3 | 228,74 | 68,6211 |
| DOG-10 | 30 ML     | TRUE  | 505,3 | 228,52 | 68,556  |
| DOG-10 | 30 ML     | TRUE  | 505,3 | 228,23 | 66,1867 |
| DOG-10 | 90 ML     | TRUE  | 505,3 | 189,76 | 56,9279 |
| DOG-10 | 90 ML     | TRUE  | 505,3 | 189,81 | 62,6377 |
| DOG-10 | 90 ML     | TRUE  | 505,3 | 190,3  | 55,1861 |
| DOG-10 | 90 ML     | TRUE  | 505,3 | 189,44 | 56,8313 |
| DOG-10 | 90 ML     | TRUE  | 505,3 | 189,69 | 58,805  |
| DOG-10 | 180 ML    | TRUE  | 505,3 | 178,99 | 51,9074 |
| DOG-10 | 180 ML    | TRUE  | 505,3 | 178,64 | 53,5918 |
| DOG-10 | 180 ML    | TRUE  | 505,3 | 179,13 | 53,7376 |
| DOG-10 | 180 ML    | TRUE  | 505,3 | 178,97 | 59,0595 |
| DOG-10 | 180 ML    | TRUE  | 505,3 | 178,74 | 51,8346 |
| DOG-11 | 0 SOUND   | FALSE | 470,4 | 224,49 | 67,347  |
| DOG-11 | 0 SOUND   | FALSE | 470,4 | 235,61 | 70,683  |
| DOG-11 | 0 SOUND   | FALSE | 470,4 | 242,78 | 72,834  |
| DOG-11 | 0 SOUND   | FALSE | 470,4 | 230,99 | 71,6069 |
| DOG-11 | 0 SOUND   | FALSE | 470,4 | 211,91 | 67,8112 |
| DOG-11 | 30 SOUND  | FALSE | 470,4 | 220,56 | 66,168  |
| DOG-11 | 30 SOUND  | FALSE | 470,4 | 217,76 | 67,5056 |
| DOG-11 | 30 SOUND  | FALSE | 470,4 | 252,87 | 83,4471 |
| DOG-11 | 30 SOUND  | FALSE | 470,4 | 238,56 | 69,1824 |
| DOG-11 | 30 SOUND  | FALSE | 470,4 | 224,34 | 67,302  |
| DOG-11 | 90 SOUND  | FALSE | 470,4 | 246,26 | 73,878  |
| DOG-11 | 90 SOUND  | FALSE | 470,4 | 243,12 | 72,936  |
| DOG-11 | 90 SOUND  | FALSE | 470,4 | 218,22 | 63,2838 |
| DOG-11 | 90 SOUND  | FALSE | 470,4 | 229,24 | 71,0644 |
| DOG-11 | 90 SOUND  | FALSE | 470,4 | 226,46 | 74,7318 |
| DOG-11 | 180 SOUND | FALSE | 470,4 | 247,43 | 76,7033 |
| DOG-11 | 180 SOUND | FALSE | 470,4 | 234,25 | 70,275  |
| DOG-11 | 180 SOUND | FALSE | 470,4 | 213,34 | 64,002  |
| DOG-11 | 180 SOUND | FALSE | 470,4 | 228,34 | 66,2186 |
| DOG-11 | 180 SOUND | FALSE | 470,4 | 230,56 | 76,0848 |
| DOG-12 | 0 SOUND   | FALSE | 490   | 223,54 | 67,062  |
| DOG-12 | 0 SOUND   | FALSE | 490   | 225,55 | 69,9205 |
| DOG-12 | 0 SOUND   | FALSE | 490   | 216,49 | 64,947  |
| DOG-12 | 0 SOUND   | FALSE | 490   | 214,98 | 62,3442 |

Hojal

|        |     |       |       |     |        |         |
|--------|-----|-------|-------|-----|--------|---------|
| DOG-12 | 0   | SOUND | FALSE | 490 | 212,64 | 70,1712 |
| DOG-12 | 30  | SOUND | FALSE | 490 | 213,8  | 64,14   |
| DOG-12 | 30  | SOUND | FALSE | 490 | 218,28 | 67,6668 |
| DOG-12 | 30  | SOUND | FALSE | 490 | 228,2  | 68,46   |
| DOG-12 | 30  | SOUND | FALSE | 490 | 222,73 | 71,2736 |
| DOG-12 | 30  | SOUND | FALSE | 490 | 229,28 | 68,784  |
| DOG-12 | 90  | SOUND | FALSE | 490 | 218,58 | 65,574  |
| DOG-12 | 90  | SOUND | FALSE | 490 | 224,3  | 67,29   |
| DOG-12 | 90  | SOUND | FALSE | 490 | 216,22 | 67,0282 |
| DOG-12 | 90  | SOUND | FALSE | 490 | 223,4  | 64,786  |
| DOG-12 | 90  | SOUND | FALSE | 490 | 222,64 | 71,2448 |
| DOG-12 | 180 | SOUND | FALSE | 490 | 217,46 | 67,4126 |
| DOG-12 | 180 | SOUND | FALSE | 490 | 223,65 | 67,095  |
| DOG-12 | 180 | SOUND | FALSE | 490 | 223,87 | 64,9223 |
| DOG-12 | 180 | SOUND | FALSE | 490 | 221,98 | 73,2534 |
| DOG-12 | 180 | SOUND | FALSE | 490 | 221,19 | 66,357  |
| DOG-13 | 0   | LL    | TRUE  | 480 | 261,25 | 78,375  |
| DOG-13 | 0   | LL    | TRUE  | 480 | 247,23 | 76,6413 |
| DOG-13 | 0   | LL    | TRUE  | 480 | 247,22 | 81,5826 |
| DOG-13 | 0   | LL    | TRUE  | 480 | 238,16 | 71,448  |
| DOG-13 | 0   | LL    | TRUE  | 480 | 236,75 | 68,6575 |
| DOG-13 | 30  | LL    | TRUE  | 480 | 274,51 | 85,0981 |
| DOG-13 | 30  | LL    | TRUE  | 480 | 245,17 | 73,551  |
| DOG-13 | 30  | LL    | TRUE  | 480 | 247,27 | 71,7083 |
| DOG-13 | 30  | LL    | TRUE  | 480 | 258,67 | 77,601  |
| DOG-13 | 30  | LL    | TRUE  | 480 | 262    | 78,6    |
| DOG-13 | 90  | LL    | TRUE  | 480 | 266,45 | 79,935  |
| DOG-13 | 90  | LL    | TRUE  | 480 | 236,23 | 73,2313 |
| DOG-13 | 90  | LL    | TRUE  | 480 | 255,87 | 76,761  |
| DOG-13 | 90  | LL    | TRUE  | 480 | 250,74 | 72,7146 |
| DOG-13 | 90  | LL    | TRUE  | 480 | 260,37 | 83,3184 |
| DOG-13 | 180 | LL    | TRUE  | 480 | 235,34 | 70,602  |
| DOG-13 | 180 | LL    | TRUE  | 480 | 247,21 | 76,6351 |
| DOG-13 | 180 | LL    | TRUE  | 480 | 229,43 | 66,5347 |
| DOG-13 | 180 | LL    | TRUE  | 480 | 256,87 | 77,061  |
| DOG-13 | 180 | LL    | TRUE  | 480 | 266,55 | 85,296  |
| DOG-13 | 0   | ML    | TRUE  | 480 | 199,84 | 59,952  |
| DOG-13 | 0   | ML    | TRUE  | 480 | 190,88 | 59,1728 |
| DOG-13 | 0   | ML    | TRUE  | 480 | 203,29 | 60,987  |
| DOG-13 | 0   | ML    | TRUE  | 480 | 206    | 59,74   |
| DOG-13 | 0   | ML    | TRUE  | 480 | 198,56 | 65,5248 |
| DOG-13 | 30  | ML    | TRUE  | 480 | 244,26 | 75,7206 |
| DOG-13 | 30  | ML    | TRUE  | 480 | 231,68 | 67,1872 |
| DOG-13 | 30  | ML    | TRUE  | 480 | 232,74 | 69,822  |
| DOG-13 | 30  | ML    | TRUE  | 480 | 241,62 | 72,486  |
| DOG-13 | 30  | ML    | TRUE  | 480 | 244,47 | 73,341  |
| DOG-13 | 90  | ML    | TRUE  | 480 | 198,07 | 59,421  |
| DOG-13 | 90  | ML    | TRUE  | 480 | 187,59 | 58,1529 |
| DOG-13 | 90  | ML    | TRUE  | 480 | 193,71 | 58,113  |
| DOG-13 | 90  | ML    | TRUE  | 480 | 193,61 | 56,1469 |
| DOG-13 | 90  | ML    | TRUE  | 480 | 197,67 | 57,3243 |
| DOG-13 | 180 | ML    | TRUE  | 480 | 187,32 | 56,196  |
| DOG-13 | 180 | ML    | TRUE  | 480 | 182,15 | 56,4665 |
| DOG-13 | 180 | ML    | TRUE  | 480 | 184,43 | 55,329  |
| DOG-13 | 180 | ML    | TRUE  | 480 | 195,27 | 56,6283 |



Hojal

|        |          |       |       |        |         |
|--------|----------|-------|-------|--------|---------|
| DOG-13 | 180 ML   | TRUE  | 480   | 180,05 | 57,616  |
| DOG-14 | 0 LL     | TRUE  | 464   | 246,75 | 74,025  |
| DOG-14 | 0 LL     | TRUE  | 464   | 237,96 | 71,388  |
| DOG-14 | 0 LL     | TRUE  | 464   | 245,21 | 71,1109 |
| DOG-14 | 0 LL     | TRUE  | 464   | 223,36 | 69,2416 |
| DOG-14 | 0 LL     | TRUE  | 464   | 215,31 | 62,4399 |
| DOG-14 | 30 LL    | TRUE  | 464   | 266,54 | 79,962  |
| DOG-14 | 30 LL    | TRUE  | 464   | 243,74 | 75,5594 |
| DOG-14 | 30 LL    | TRUE  | 464   | 257,23 | 77,169  |
| DOG-14 | 30 LL    | TRUE  | 464   | 238,56 | 69,1824 |
| DOG-14 | 30 LL    | TRUE  | 464   | 246,1  | 71,369  |
| DOG-14 | 90 LL    | TRUE  | 464   | 252,86 | 78,3866 |
| DOG-14 | 90 LL    | TRUE  | 464   | 261,23 | 78,369  |
| DOG-14 | 90 LL    | TRUE  | 464   | 241,44 | 72,432  |
| DOG-14 | 90 LL    | TRUE  | 464   | 239,07 | 69,3303 |
| DOG-14 | 90 LL    | TRUE  | 464   | 240,6  | 76,992  |
| DOG-14 | 180 LL   | TRUE  | 464   | 256,23 | 76,869  |
| DOG-14 | 180 LL   | TRUE  | 464   | 224,76 | 69,6756 |
| DOG-14 | 180 LL   | TRUE  | 464   | 249,54 | 74,862  |
| DOG-14 | 180 LL   | TRUE  | 464   | 233,32 | 67,6628 |
| DOG-14 | 180 LL   | TRUE  | 464   | 271,25 | 86,8    |
| DOG-14 | 0 ML     | TRUE  | 464   | 197,1  | 59,13   |
| DOG-14 | 0 ML     | TRUE  | 464   | 206,03 | 61,809  |
| DOG-14 | 0 ML     | TRUE  | 464   | 187,46 | 54,3634 |
| DOG-14 | 0 ML     | TRUE  | 464   | 194,95 | 60,4345 |
| DOG-14 | 0 ML     | TRUE  | 464   | 197,37 | 63,1584 |
| DOG-14 | 30 ML    | TRUE  | 464   | 218,76 | 65,628  |
| DOG-14 | 30 ML    | TRUE  | 464   | 212,27 | 65,8037 |
| DOG-14 | 30 ML    | TRUE  | 464   | 224,02 | 67,206  |
| DOG-14 | 30 ML    | TRUE  | 464   | 237,43 | 68,8547 |
| DOG-14 | 30 ML    | TRUE  | 464   | 224,31 | 71,7792 |
| DOG-14 | 90 ML    | TRUE  | 464   | 193,02 | 57,906  |
| DOG-14 | 90 ML    | TRUE  | 464   | 188,97 | 58,5807 |
| DOG-14 | 90 ML    | TRUE  | 464   | 183,65 | 55,095  |
| DOG-14 | 90 ML    | TRUE  | 464   | 189,76 | 55,0304 |
| DOG-14 | 90 ML    | TRUE  | 464   | 188,11 | 56,433  |
| DOG-14 | 180 ML   | TRUE  | 464   | 194,87 | 58,461  |
| DOG-14 | 180 ML   | TRUE  | 464   | 189,96 | 56,988  |
| DOG-14 | 180 ML   | TRUE  | 464   | 191,34 | 59,3154 |
| DOG-14 | 180 ML   | TRUE  | 464   | 187,36 | 54,3344 |
| DOG-14 | 180 ML   | TRUE  | 464   | 195,43 | 60,5833 |
| DOG-15 | 0 SOUND  | FALSE | 450,8 | 224,71 | 67,413  |
| DOG-15 | 0 SOUND  | FALSE | 450,8 | 219,57 | 63,6753 |
| DOG-15 | 0 SOUND  | FALSE | 450,8 | 214,3  | 62,147  |
| DOG-15 | 0 SOUND  | FALSE | 450,8 | 212,36 | 61,5844 |
| DOG-15 | 0 SOUND  | FALSE | 450,8 | 236,24 | 73,2344 |
| DOG-15 | 30 SOUND | FALSE | 450,8 | 198,95 | 59,685  |
| DOG-15 | 30 SOUND | FALSE | 450,8 | 227,21 | 70,4351 |
| DOG-15 | 30 SOUND | FALSE | 450,8 | 196,93 | 59,079  |
| DOG-15 | 30 SOUND | FALSE | 450,8 | 219,36 | 72,3888 |
| DOG-15 | 30 SOUND | FALSE | 450,8 | 234,22 | 67,9238 |
| DOG-15 | 90 SOUND | FALSE | 450,8 | 232,56 | 69,768  |
| DOG-15 | 90 SOUND | FALSE | 450,8 | 196,33 | 60,8623 |
| DOG-15 | 90 SOUND | FALSE | 450,8 | 221,16 | 66,348  |
| DOG-15 | 90 SOUND | FALSE | 450,8 | 223,34 | 64,7686 |

### Hojal

|        |     |       |       |       |        |         |
|--------|-----|-------|-------|-------|--------|---------|
| DOG-15 | 90  | SOUND | FALSE | 450,8 | 197,42 | 65,1486 |
| DOG-15 | 180 | SOUND | FALSE | 450,8 | 232,24 | 69,672  |
| DOG-15 | 180 | SOUND | FALSE | 450,8 | 219,46 | 68,0326 |
| DOG-15 | 180 | SOUND | FALSE | 450,8 | 198,25 | 59,475  |
| DOG-15 | 180 | SOUND | FALSE | 450,8 | 229,87 | 66,6623 |
| DOG-15 | 180 | SOUND | FALSE | 450,8 | 218,23 | 72,0159 |

| dog    | diseased | day | LIMITAC.FUN | MOV.ARTIC | ATROFIA | BIOARTH.SC | VAS.SCORE |
|--------|----------|-----|-------------|-----------|---------|------------|-----------|
| DOG-1  | TRUE     | 0   | 10          | 6         | 1       | 17         | 50        |
| DOG-1  | TRUE     | 30  | 3           | 3         | 2       | 8          | 35        |
| DOG-1  | TRUE     | 90  | 3           | 2         | 1       | 6          | 18        |
| DOG-1  | TRUE     | 180 | 1           | 1         | 2       | 4          | 10        |
| DOG-2  | TRUE     | 0   | 16          | 7         | 3       | 26         | 53        |
| DOG-2  | TRUE     | 30  | 10          | 5         | 3       | 18         | 27        |
| DOG-2  | TRUE     | 90  | 7           | 6         | 2       | 15         | 15        |
| DOG-2  | TRUE     | 180 | 11          | 3         | 2       | 16         | 12        |
| DOG-3  | TRUE     | 0   | 13          | 4         | 2       | 19         | 58        |
| DOG-3  | TRUE     | 30  | 7           | 1         | 1       | 9          | 20        |
| DOG-3  | TRUE     | 90  | 6           | 2         | 2       | 10         | 17        |
| DOG-3  | TRUE     | 180 | 4           | 1         | 1       | 6          | 11        |
| DOG-4  | FALSE    | 0   | 0           | 1         | 2       | 3          | 5         |
| DOG-4  | FALSE    | 30  | 0           | 2         | 1       | 3          | 2         |
| DOG-4  | FALSE    | 90  | 0           | 1         | 1       | 2          | 2         |
| DOG-4  | FALSE    | 180 | 0           | 0         | 2       | 2          | 2         |
| DOG-5  | TRUE     | 0   | 17          | 7         | 2       | 26         | 68,33     |
| DOG-5  | TRUE     | 30  | 17          | 5         | 3       | 25         | 39,78     |
| DOG-5  | TRUE     | 90  | 13          | 7         | 3       | 23         | 27        |
| DOG-5  | TRUE     | 180 | 8           | 6         | 2       | 16         | 15        |
| DOG-6  | TRUE     | 0   | 16          | 4         | 2       | 22         | 64        |
| DOG-6  | TRUE     | 30  | 9           | 6         | 2       | 17         | 49        |
| DOG-6  | TRUE     | 90  | 6           | 5         | 1       | 12         | 39        |
| DOG-6  | TRUE     | 180 | 13          | 4         | 2       | 19         | 37        |
| DOG-7  | TRUE     | 0   | 23          | 6         | 2       | 31         | 59        |
| DOG-7  | TRUE     | 30  | 12          | 4         | 2       | 18         | 17        |
| DOG-7  | TRUE     | 90  | 5           | 5         | 1       | 11         | 11        |
| DOG-7  | TRUE     | 180 | 4           | 5         | 1       | 10         | 7         |
| DOG-8  | FALSE    | 0   | 1           | 2         | 1       | 4          | 2         |
| DOG-8  | FALSE    | 30  | 1           | 1         | 0       | 2          | 1         |
| DOG-8  | FALSE    | 90  | 1           | 2         | 0       | 3          | 1         |
| DOG-8  | FALSE    | 180 | 1           | 0         | 0       | 1          | 1         |
| DOG-9  | TRUE     | 0   | 14          | 5         | 1       | 20         | 50,33     |
| DOG-9  | TRUE     | 30  | 6           | 1         | 2       | 9          | 31        |
| DOG-9  | TRUE     | 90  | 6           | 2         | 1       | 9          | 11        |
| DOG-9  | TRUE     | 180 | 6           | 2         | 0       | 8          | 11        |
| DOG-10 | TRUE     | 0   | 16          | 6         | 1       | 23         | 54        |
| DOG-10 | TRUE     | 30  | 14          | 1         | 4       | 19         | 36        |
| DOG-10 | TRUE     | 90  | 10          | 3         | 2       | 15         | 23        |
| DOG-10 | TRUE     | 180 | 10          | 3         | 1       | 14         | 13        |
| DOG-11 | FALSE    | 0   | 0           | 2         | 0       | 2          | 0         |
| DOG-11 | FALSE    | 30  | 0           | 2         | 0       | 2          | 0         |
| DOG-11 | FALSE    | 90  | 0           | 1         | 0       | 1          | 0         |
| DOG-11 | FALSE    | 180 | 0           | 1         | 0       | 1          | 0         |
| DOG-12 | FALSE    | 0   | 0           | 0         | 0       | 0          | 0         |
| DOG-12 | FALSE    | 30  | 1           | 0         | 0       | 1          | 0         |
| DOG-12 | FALSE    | 90  | 0           | 1         | 0       | 1          | 0         |
| DOG-12 | FALSE    | 180 | 0           | 1         | 0       | 1          | 0         |
| DOG-13 | TRUE     | 0   | 15          | 4         | 1       | 20         | 36        |
| DOG-13 | TRUE     | 30  | 9           | 3         | 1       | 13         | 33        |
| DOG-13 | TRUE     | 90  | 5           | 1         | 1       | 7          | 16        |
| DOG-13 | TRUE     | 180 | 4           | 1         | 0       | 5          | 11        |
| DOG-14 | TRUE     | 0   | 12          | 6         | 1       | 19         | 55        |
| DOG-14 | TRUE     | 30  | 6           | 3         | 2       | 11         | 43        |
| DOG-14 | TRUE     | 90  | 4           | 5         | 1       | 10         | 31        |
| DOG-14 | TRUE     | 180 | 4           | 3         | 1       | 8          | 25        |
| DOG-15 | FALSE    | 0   | 0           | 2         | 1       | 3          | 0         |
| DOG-15 | FALSE    | 30  | 1           | 2         | 0       | 3          | 0         |
| DOG-15 | FALSE    | 90  | 0           | 1         | 1       | 2          | 0         |
| DOG-15 | FALSE    | 180 | 0           | 0         | 1       | 1          | 0         |
